# Supplementary material for: Clinical Impact of the BIOFIRE Blood Culture Identification 2 Panel in Adult Patients with Bloodstream Infection: A Multicentre Observational Study in the United Arab Emirates
Source: MDPI journal article supplement (doi:10.3390/diagnostics13142433), 2023-07-21
Supplement: s1 [file s1]

**Table S1.** Number of detected organisms, resistance phenotypes (per conventional methods) and resistance genes (per BCID2 Panel) in patients of the pre-BCID2 ( $n = 87$ ) and BCID2 ( $n = 85$ ) implementation periods with at least one detected pathogen.

| Organism                               | Pre-BCID2 organisms<br>( $n = 91$ ) |                                                                               | BCID2-phase organisms<br>( $n = 98$ ) |                                       |                                                                                                                  |
|----------------------------------------|-------------------------------------|-------------------------------------------------------------------------------|---------------------------------------|---------------------------------------|------------------------------------------------------------------------------------------------------------------|
|                                        | N                                   | Resistance phenotype                                                          | N                                     | Resistance phenotype                  | Resistance genes (BCID2 panel)                                                                                   |
| <i>Klebsiella pneumoniae</i>           | 19                                  | ESBL ( $n = 3$ );<br>AmpC ( $n = 1$ );<br>CPE ( $n = 4$ );<br>CRE ( $n = 1$ ) | 12                                    | ESBL ( $n = 1$ );<br>CPE ( $n = 1$ )  | CTX-M ( $n = 4$ );<br>OXA-48-like ( $n = 1$ );<br>CTX-M + NDM ( $n = 1$ );<br>CTX-M + OXA-48-like<br>( $n = 1$ ) |
| <i>Escherichia coli</i>                | 14                                  |                                                                               | 13                                    | ESBL ( $n = 1$ );<br>AmpC ( $n = 1$ ) | CTX-M ( $n = 7$ );<br><i>mcr-1</i> ( $n = 1$ );<br>NDM ( $n = 1$ )                                               |
| <i>Staphylococcus epidermidis</i>      | 10                                  |                                                                               | 10                                    |                                       | <i>mecA/C</i> ( $n = 10$ )                                                                                       |
| <i>Candida auris</i>                   | 0                                   |                                                                               | 13                                    |                                       |                                                                                                                  |
| <i>Candida tropicalis</i>              | 2                                   |                                                                               | 6                                     |                                       |                                                                                                                  |
| <i>Staphylococcus aureus</i>           | 6                                   | MRSA ( $n = 2$ )                                                              | 1                                     |                                       |                                                                                                                  |
| <i>Candida parapsilosis</i>            | 4                                   |                                                                               | 5                                     |                                       |                                                                                                                  |
| <i>Staphylococcus capitis</i>          | 5                                   |                                                                               | 4                                     |                                       |                                                                                                                  |
| <i>Staphylococcus haemolyticus</i>     | 4                                   |                                                                               | 2                                     |                                       |                                                                                                                  |
| <i>Staphylococcus hominis</i>          | 4                                   |                                                                               | 2                                     |                                       |                                                                                                                  |
| <i>Acinetobacter baumannii</i> complex | 1                                   |                                                                               | 4                                     |                                       |                                                                                                                  |
| <i>Enterococcus faecalis</i>           | 2                                   |                                                                               | 2                                     |                                       |                                                                                                                  |
| <i>Enterobacter cloacae</i> complex    | 2                                   |                                                                               | 2                                     |                                       |                                                                                                                  |
| <i>Serratia marcescens</i>             | 1                                   |                                                                               | 2                                     |                                       |                                                                                                                  |
| <i>Enterococcus faecium</i>            | 1                                   |                                                                               | 2                                     |                                       |                                                                                                                  |
| <i>Streptococcus pneumoniae</i>        | 1                                   |                                                                               | 2                                     |                                       |                                                                                                                  |
| <i>Stenotrophomonas maltophilia</i>    | 2                                   |                                                                               | 0                                     |                                       |                                                                                                                  |
| <i>Elizabethkingia meningoseptica</i>  | 0                                   |                                                                               | 2                                     |                                       |                                                                                                                  |
| <i>Klebsiella aerogenes</i>            | 0                                   |                                                                               | 2                                     |                                       | OXA-48-like ( $n = 1$ )                                                                                          |
| <i>Streptococcus viridans</i>          | 0                                   |                                                                               | 2                                     |                                       |                                                                                                                  |
| <i>Corynebacterium</i> spp.            | 1                                   |                                                                               | 1                                     |                                       |                                                                                                                  |
| <i>Candida albicans</i>                | 1                                   |                                                                               | 1                                     |                                       |                                                                                                                  |
| <i>Candida krusei</i>                  | 1                                   |                                                                               | 1                                     |                                       |                                                                                                                  |
| <i>Pseudomonas aeruginosa</i>          | 0                                   |                                                                               | 1                                     |                                       |                                                                                                                  |
| <i>Candida glabrata</i>                | 1                                   |                                                                               | 0                                     |                                       |                                                                                                                  |
| <i>Enterococcus gallinarum</i>         | 1                                   |                                                                               | 0                                     |                                       |                                                                                                                  |
| Others                                 | 8 <sup>1</sup>                      |                                                                               | 6 <sup>2</sup>                        |                                       |                                                                                                                  |

<sup>1</sup> One each of the following: *Burkholderia cepacia*, *Klebsiella Ozaenae*, *Lactobacillus casei*, *Proteus mirabilis*, *Rothia mucilaginosa*, *Salmonella* species, *Weissella confusa*, *Leuconostoc pseudomesenteroides*; <sup>2</sup> One each of the following: *Staphylococcus* spp., *Bacteroides fragilis*, *Enterococcus Avium* Group D, *Kytococcus* spp., *Streptococcus oralis*, *Aeromonas sobria*. Abbreviations: AmpC, class C beta-lactamase; CPE, carbapenemase-producing enterobacteriaceae; CRE, Carbapenem-resistant enterobacteriaceae; ESBL, positive for extended spectrum beta-lactamase; MRSA, methicillin-resistant *Staphylococcus aureus*.

**Table S2.** Resistance and susceptibility to antimicrobial treatment in the pre-BCID2 implementation phase.

| Antimicrobial medication | Resistant | Susceptible | Total number of isolates tested | % tested isolates susceptible to medication |
|--------------------------|-----------|-------------|---------------------------------|---------------------------------------------|
| AMIKACIN                 | 4         | 38          | 42                              | 90.5                                        |
| AMOXICILLIN/CLAVUL.      | 15        | 28          | 43                              | 65.1                                        |
| AMPHOTERICIN B           | 0         | 8           | 8                               | 100.0                                       |
| AMPICILLIN               | 31        | 12          | 43                              | 27.9                                        |
| CASPOFUNGIN              | 2         | 6           | 8                               | 75.0                                        |
| CEFACLO                  | 0         | 5           | 5                               | 100.0                                       |
| CEFAZOLIN                | 0         | 5           | 5                               | 100.0                                       |
| CEFEPIME                 | 17        | 34          | 51                              | 66.7                                        |
| CEFIXIME                 | 0         | 5           | 5                               | 100.0                                       |
| CEFOTAXIME               | 21        | 22          | 43                              | 51.2                                        |
| CEFTAZIDIME              | 20        | 29          | 49                              | 59.2                                        |
| CEFTAZIDIME AVIBACTAM    | 4         | 0           | 4                               | 0.0                                         |
| CEFTOLOZANE TAZOBACTAM   | 7         | 22          | 29                              | 75.9                                        |
| CEFTRIAZONE              | 16        | 28          | 44                              | 63.6                                        |
| CEFUROXIME               | 13        | 11          | 24                              | 45.8                                        |
| CIPROFLOXACIN            | 24        | 32          | 56                              | 57.1                                        |
| CLINDAMYCIN              | 9         | 12          | 21                              | 57.1                                        |
| COLISTIN                 | 0         | 4           | 4                               | 100.0                                       |
| ERTAPENEM                | 7         | 34          | 41                              | 82.9                                        |
| FLUCONAZOLE              | 4         | 2           | 6                               | 33.3                                        |
| FLUCYTOSINE              | 1         | 7           | 8                               | 87.5                                        |
| FOSFOMYCIN               | 7         | 30          | 37                              | 81.1                                        |
| GENTAMICIN               | 12        | 52          | 64                              | 81.3                                        |
| IMIPENEM                 | 8         | 34          | 42                              | 81.0                                        |
| LEVOFLOXACIN             | 11        | 14          | 25                              | 56.0                                        |
| LINEZOLID                | 0         | 27          | 27                              | 100.0                                       |
| MEROPENEM                | 7         | 39          | 46                              | 84.8                                        |
| MICAFUNGIN               | 1         | 7           | 8                               | 87.5                                        |
| MOXIFLOXACIN             | 6         | 6           | 12                              | 50.0                                        |
| NORFLOXACIN              | 13        | 23          | 36                              | 63.9                                        |
| PIPERACILLIN/TAZOBACTAM  | 11        | 36          | 47                              | 76.6                                        |
| RIFAMPICIN               | 2         | 15          | 17                              | 88.2                                        |
| TEICOPLANIN              | 0         | 15          | 15                              | 100.0                                       |
| TIGECYCLINE              | 0         | 20          | 20                              | 100.0                                       |
| TRIMETHOPRIM (TMP)       | 18        | 44          | 62                              | 71.0                                        |
| TOBRAMYCIN               | 6         | 18          | 24                              | 75.0                                        |
| VANCOMYCIN               | 4         | 24          | 28                              | 85.7                                        |
| VORICONAZOLE             | 1         | 8           | 9                               | 88.9                                        |

**Table S3.** Resistance and susceptibility to antimicrobial treatment in the BCID2 implementation phase.

| Antimicrobial medication | Resistant | Susceptible | Total number of isolates tested | % tested isolates susceptible to medication |
|--------------------------|-----------|-------------|---------------------------------|---------------------------------------------|
| AMIKACIN                 | 3         | 28          | 31                              | 90.3                                        |
| AMOXICILLIN/CLAVUL.      | 17        | 13          | 30                              | 43.3                                        |
| AMPHOTERICIN B           | 0         | 12          | 12                              | 100.0                                       |
| AMPICILLIN               | 26        | 6           | 32                              | 18.8                                        |
| CASPOFUNGIN              | 0         | 9           | 9                               | 100.0                                       |
| CEFACLOR                 | 4         | 4           | 8                               | 50.0                                        |
| CEFAZOLIN                | 4         | 1           | 5                               | 20.0                                        |
| CEFEPIME                 | 16        | 19          | 35                              | 54.3                                        |
| CEFIXIME                 | 4         | 3           | 7                               | 42.9                                        |
| CEFOTAXIME               | 19        | 12          | 31                              | 38.7                                        |
| CEFTAZIDIME              | 19        | 14          | 33                              | 42.4                                        |
| CEFTAZIDIME AVIBACTAM    | 0         | 8           | 8                               | 100.0                                       |
| CEFTOLOZANE TAZOBACTAM   | 3         | 10          | 13                              | 76.9                                        |
| CEFTRIAZONE              | 13        | 17          | 30                              | 56.7                                        |
| CEFUROXIME               | 18        | 7           | 25                              | 28.0                                        |
| CIPROFLOXACIN            | 16        | 21          | 37                              | 56.8                                        |
| CLINDAMYCIN              | 10        | 7           | 17                              | 41.2                                        |
| COLISTIN                 | 0         | 5           | 5                               | 100.0                                       |
| ERTAPENEM                | 6         | 26          | 32                              | 81.3                                        |
| FLUCONAZOLE              | 2         | 8           | 10                              | 80.0                                        |
| FLUCYTOSINE              | 1         | 11          | 12                              | 91.7                                        |
| FOSFOMYCIN               | 6         | 20          | 26                              | 76.9                                        |
| GENTAMICIN               | 10        | 37          | 47                              | 78.7                                        |
| IMIPENEM                 | 7         | 25          | 32                              | 78.1                                        |
| LEVOFLOXACIN             | 12        | 16          | 28                              | 57.1                                        |
| LINEZOLID                | 1         | 23          | 24                              | 95.8                                        |
| MEROPENEM                | 7         | 26          | 33                              | 78.8                                        |
| MICAFUNGIN               | 0         | 9           | 9                               | 100.0                                       |
| MOXIFLOXACIN             | 5         | 6           | 11                              | 54.5                                        |
| NORFLOXACIN              | 5         | 11          | 16                              | 68.8                                        |
| PIPERACILLIN/TAZOBACTAM  | 15        | 18          | 33                              | 54.5                                        |
| RIFAMPICIN               | 0         | 16          | 16                              | 100.0                                       |
| TEICOPLANIN              | 4         | 14          | 18                              | 77.8                                        |
| TIGECYCLINE              | 0         | 23          | 23                              | 100.0                                       |
| TRIMETHOPRIM (TMP)       | 12        | 39          | 51                              | 76.5                                        |
| TOBRAMYCIN               | 7         | 25          | 32                              | 78.1                                        |
| VANCOMYCIN               | 1         | 25          | 26                              | 96.2                                        |
| VORICONAZOLE             | 0         | 12          | 12                              | 100.0                                       |

**Table S4.** Discordant pathogens detected by conventional culture *vs.* the BCID2 Panel among patients in the BCID2 implementation period ( $n = 24$  discordant pathogens in  $n = 18$  patients).

| Patient | Organism identified by conventional culture        | Organism identified by BCID2           |
|---------|----------------------------------------------------|----------------------------------------|
| 1       | <i>Staphylococcus hominis</i> <sup>1</sup>         | <i>Staphylococcus epidermidis</i>      |
| 2       | <i>Staphylococcus haemolyticus</i> <sup>1</sup>    | <i>Staphylococcus epidermidis</i>      |
| 3       | No detection                                       | <i>Candida auris</i>                   |
| 3       | No detection                                       | <i>Staphylococcus epidermidis</i>      |
| 4       | No detection                                       | <i>Acinetobacter baumannii</i> complex |
| 5       | No detection                                       | <i>Klebsiella pneumoniae</i>           |
| 6       | No detection                                       | <i>Streptococcus pneumoniae</i>        |
| 7       | <i>Corynebacterium</i> spp. <sup>2</sup>           | No detection                           |
| 8       | <i>Pseudomonas aeruginosa</i>                      | No detection                           |
| 9       | <i>Kytococcus</i> spp. <sup>2</sup>                | No detection                           |
| 10      | <i>Staphylococcus haemolyticus</i> <sup>1</sup>    | No detection                           |
| 11      | <i>Aeromonas sobria</i> <sup>2</sup>               | No detection                           |
| 12      | <i>Enterococcus Avium</i> Group D <sup>2</sup>     | No detection                           |
| 13      | <i>Candida krusei</i>                              | No detection                           |
| 14      | <i>Candida tropicalis</i>                          | No detection                           |
| 15      | <i>Serratia marcescens</i>                         | No detection                           |
| 16      | <i>Elizabethkingia meningoseptica</i> <sup>2</sup> | <i>Escherichia coli</i>                |
| 17      | <i>Elizabethkingia meningoseptica</i> <sup>2</sup> | <i>Candida auris</i>                   |
| 18      | <i>Streptococcus viridans</i> <sup>1</sup>         | <i>Staphylococcus</i> spp.             |

<sup>1</sup> Species not included in the BCID2 panel (but respective genus – *Staphylococcus* spp. and *Streptococcus* spp. – are on panel); <sup>2</sup> Off-panel microorganisms (not included in the BCID2 panel).
